# Supplementary material
Source: publisher site journal article supplement (https://www.dovepress.com/article/463894)
Supplement: Supplementary file 1 [file get_supplementary_file.php]

Supplementary table 1 Basic characteristics of included studies

| Author，year（country ） | Study Design | Sample size（experiment/control） | Management team | Management strategies | | Time | Measuredindicators | Management effect |
| --- | --- | --- | --- | --- | --- | --- | --- | --- |
| Experiment | Control |
| Ikeda et al. 2021，Brazil[56] | rct | 35/32 | ND | ③c ④ab | NA | ND | ⑦a | Improve reading speed |
| Gao wenxue et al.2021,China[49] | quasi-experiment |  | ND | ④ab⑤d⑦ | NA | ND | ⑩c | Efficient screening and referral |
| Bon et al. 2020, France[35] | quasi-experiment | 67 | Resident, attending doctor, ophthalmologist, clinical nursing team | ③a④ac⑤d  ⑨ab | NA | ND | ⑩c | Far and near vision improved significantly, and the proportion of low vision eyes decreased significantly |
| Chen chen et al.2020,China[43] | rct | 53/55 | General practitioners, ophthalmologists and family physician assistants | ④a②a⑤b⑦ | Routine diagnosis | 2 months | ⑩bc | The blood sugar and blood lipid were significantly improved, and the DR progress and the proportion of new hypertension patients were significantly reduced |
| Dengxue Wang et al. 2020, China[42] | quasi-experiment | 253 | Ophthalmologists and community medical staff of tertiary hospitals | ②a④a⑤d⑦ | NA | 1 year | ⑨a⑩bc | Significant improvement in blood pressure, blood lipid and DR awareness |
| Li Deng et al.2020,China[51] | rct | 126/126 | ND | General management+②abd⑧a | General management | 1 year | ②b⑨a⑩bc③dg | The rate of knowledge awareness, blood glucose and compliance with doctor's advice were significantly improved compared with the control group |
| Man et al. 2020, Australia[45] | rct | 95/83 | Optometrist with family and low vision nursing professional experience | ③a④ac⑦ | Referral to eye care service center | 6 months | main：⑩c secondary：①c②ab ④a | The scores of near vision, anxiety, depression and vision in the intervention group were significantly improved |
| Hark et al.2019,America[46] | quasi-experiment | 40 | social worker | ③a⑦⑧ab⑨a |  | 6 months | ①bc | The depression and psychological pain are significantly reduced |
| Kaltenegger et al. 2019，Germany[57] | rct | 12/25 | ND | ③c | Placebo training (crossword puzzle) | 18 weeks | Main：⑦a  secondary：①c②b⑦b⑩c | The reading speed, depression and QoL in the control group were significantly improved |
| Ghasemi et al.2018,  Iran[36] | rct | 28/29 | Nurses, ophthalmologists, social workers, nutritionists and behavioral therapists | General training+①a④a⑤b | General  training | 3 months | ②a | Visual related QoL significantly improved compared with the control group |
| Chen et al. 2018,  China[52] | rct | 119/114 | ND | Routine care+②af⑨b | Examination date of oral reminder for the first visit | ND | Main：③c  secondary：⑥a⑨a⑩c | The attendance rate of ophthalmic examination, DR knowledge score and nursing satisfaction were significantly higher than those of the control group |
| Adams et al. 2018,  England[58] | rct | 33/31 | ND | ③b | No intervention, any adverse event was recorded | 24 weeks | Main：①f；secondary：①cd②b③b④b⑤b ⑩g | There was no difference between fall fear and fall risk, physical activity, anxiety and depression, and QoL outcomes. The level of physical activity increased slightly, while the control group decreased |
| Fiscella et al. 2018,  America[53] | rct | Three groups, 200 doctors and 600 patients in each group | doctor | Doctors in Group B and Group C received education manuals containing ②ad；  Patients in group C received glaucoma education manuals including②ad | No intervention in group A | 1 year | Main:③d | No difference in medication compliance |
| Deemer et al. 2017,  America[59] | rct | 96/92 | Optometrist, occupational therapist, social worker | ③b④a⑧c | Support therapy: provide emotional support and attention | 4 months | Main：①c  secondary：⑩g | There was greater improvement in reading, family activities and outdoor activities, and there was no significant difference in the severity of depression |
| JIANG Wenjing et al. 2017，China[54] | rct | 53/54 | Head nurse, nurse in charge, attending physician | Routine care+②abcd⑨b | Routine care | 1 year | ⑨ac⑩b | The blood glucose, DR knowledge and behavior changes were significantly improved; There was no significant change in vision and stage of retinopathy in the two groups |
| Waterman et al. 2016,  England[60] | rct | 6 cases were control group, 16 cases were HS group, 17 cases were HS+HE | Orientation and Mobility Therapist，elderly volunteers | HS：⑥ab⑤e HS+HE：③b⑤de⑥ab⑧b | Routine care+②a | 6 months | Main：④a；secondary：①f②ab③ab③b⑨b⑩g | All patients fully comply with family modification suggestions; Physical activity increased significantly, and there was no significant difference in the number of falls, fear of falls, and QoL between the two groups |
| Acton et al. 2016，England[61] | rct | 35/32 | Vision rehabilitation worker | ②cd③ab④ab⑥a | ④ab | 18 months | Main：②a  secondary：①acd⑤a | Significant improvement in visual function. No significant change in secondary outcome indicators |
| ZHOU Yuanyuan et al. 2016，China[48] | rct | 74/74 | Community medical team, hospital ophthalmologist and endocrinologist | control group+②abcd⑨b | routine health records | 2years | ③f⑩bc | Follow up compliance and blood glucose level were significantly improved compared with the control group, and DR development was slower |
| HU Haishuang et al. 2016，China[41] | rct | 110/112 | Medical staff in hospitals and communities | ②abcd⑤be⑦⑧a | ②abcde⑤e | 4 months | ①c②a③g | The scores of compliance behavior and QoL were significantly improved, and the scores of anxiety and depression were significantly reduced |
| Gothwal and Bharani 2015,  India[37] | quasi-experiment | 255 | Optometrists, health educators, orientation and mobility instructors, rehabilitation professionals, and physical therapists | ③ad④b | NA | 4 months | ②a⑧a | Visual related QoL and participation in daily activities improved significantly |
| Djafari et al. 2015，Canada[55] | rct | 84/81 | Ophthalmologist | ②ad⑤d | ②ad（＜2min） | 1 year | Main：③d  secondary:⑨ac | Significantly improve the recognition of the importance of eye drops technology and eye treatment compliance |
| Rees et al. 2015，Australia[38] | rct | 93/60 | Low vision rehabilitation consultant, orthosis expert, low vision technical expert | Routine care+①③abd⑨b | ③abd ④b | 6 months | Main：②a；  secondary：①ce⑤a | There was no significant difference between groups in visual specific QoL, anxiety, depression, adaptation to visual loss and self-efficacy |
| XU Zhe 2015，China[47] | rct | 74/74 | General practitioners, community nurses, preventive health care doctors | ②abcd⑨b | Routine health education | 2 years | ⑩bc | The blood glucose was significantly better than the control group, and the development of retinopathy was slower than the control group |
| YANG Xiaoyun et al. 2015，China[44] | quasi-experiment | 260 | Ophthalmologist, community responsible doctor, rehabilitation doctor | ③a④abc⑤d⑦ | NA | ND | ⑩c | 79.2% of patients have visual acuity ≥ 0.3 |
| Rovner et al. 2014，America[62] | rct | 96/92 | Occupational therapist with low vision | ③a④b⑥b | ③a④b | 4 months | Main：①c  secondary：②a⑩ac⑧b⑨e | The incidence of depression was lower than that of the control group, and functional vision was improved. No significant change in QoL |
| Rovner et al. 2013，America[63] | rct | 121/120 | Structured Problem Solving Therapist, Support Therapy Therapist | ⑧d | Supporting statements and listening | 6 months | Main: ⑩c  secondary：①c②b⑩g | Visual function, physical activity, anxiety and depression did not change, and visual related quality of life improved |
| Renieri et al. 2013，Germany[64] | quasi-experiment | 87 | Orthopaedic | ②d③a④a | NA | 5 months | ②a⑥b①c | Proximity activities, social function and reading ability were significantly improved, while anxiety and depression remained unchanged, and life satisfaction was improved. |
| Wang et al. 2012，Australia[40] | quasi-experiment | 71 | Ophthalmologist, optometrist, consultant, community service team | ③abc④b⑦⑨a | NA | 3 months | ②a | The overall visual ability, reading, visual information and visual movement have improved |
| MA Jing 2012，China[50] | rct | 30/30 | ND | ④a②b⑧a | Conventional propaganda and teaching method | 1 year | ③g⑨c | The rate of patients who used Amsler table regularly was significantly higher than that of the control group; Eye progress improved significantly compared with the control group |
| Kovacs et al. 2012，Hungary[65] | rct | 21/20 | ND | ③d | Standard osteoporosis exercise | 6  months | ④ab⑩def | The balance was significantly improved, but there was no significant difference. There was a significant difference in mobility. The fall risk was reduced by 46%, and the mean time between events was significantly longer than that in the control group. |
| Girdler et al. 2010，Australia[39] | rct | 36/41 | Occupational therapist, social worker, optometrist, orthodontist | General services+①⑥ab⑧ | ③ab⑤d④b⑦b | 12 weeks | Main：⑧a；secondary：①ce②a⑤abc | Depression was significantly reduced, participation in life situations was improved, self-efficacy in general and specific areas was improved, and vision loss was adapted. |

DR：diabetic retinopathy；rct: randomized controlled trial;HS: Family Safety Modification, HE: Family Exercise.

**Intervention strategies:** ①Self-management;②Health education: a. disease knowledge b. diet c. exercise d. treatment and drugs f. regular eye examination g. daily life;③Rehabilitation training: a. configuration and guidance training of visual aids b. mobile training c. reading training d. daily life skills training；④Ophthalmic screening, assessment and treatment: a. screening b. assessment c. treatment;⑤Regular follow-up: a. remote follow-up b. outpatient follow-up c. WeChat family follow-up d. home visit e. telephone follow-up;⑥Environmental safety transformation: a. environmental assessment b. environmental transformation⑦Referral and transfer treatment ;⑧Psychological support：a. emotional support b. psychological counseling c. behavior activation therapy d. problem solving therapy;⑨Medical service appointment and reminder：a. medical service appointment b. follow-up reminders.

**Evaluation indicators:**①Mental status: a. mental health b. psychological pain c. anxiety and depression d. loneliness e. self-efficacy f. Fear;②QoL: a. visual related QoL b. Health related QoL;③Compliance: a. compliance with family safety modifications b. compliance with exercise and walking plans c. compliance with eye examinations d. compliance with medication e. auxiliary device usage compliance f. follow-up compliance g. compliance with medical advice;④Patient safety :a. falls frequency b. falls risk;⑤:Adaptability a. vision loss adaptation b. social adaptation;⑥Satisfaction: a. nursing satisfaction b. life satisfaction;⑦Reading ability: a. reading speed b. single word reading ability;⑧Social participation: a. participation level of life situation b. participation in social and occupational activities;⑨Knowledge attitude behavior: a. knowledge b. attitude c. behavior;⑩Physiological function: a. general health status b. biochemical indicators c. visual function d. physical activity level e. mobility f. balance g. activities of daily living (ADL)

Supplementary table 2 Health management models of the elderly with VI

| **Management models** | **Personnel and team** | **Strategies** |
| --- | --- | --- |
| Multidisciplinary team low vision rehabilitation model | A multidisciplinary team comprises optometrists, ophthalmologists, rehabilitation therapists, nurses with rich clinical experience, community medical staff, social workers, nutritionists, etc. | ③abcd④ab⑤e⑥ab⑦ab⑨ab |
| Medical consortium two-way management model | Ophthalmologist of tertiary hospital and community health service center medical staff. | ②abcd③b④abc⑤bde⑧a |
| Low vision community comprehensive rehabilitation model | Community, low vision combined outpatient clinic, hospital medical staff. | ③a④abc⑤b⑦b |
| Three-level low vision care model | Multidisciplinary team | Primary level：②abcdef⑥ab;  Secondary：③a;  Tertiary：②abcd③abcd④abc⑤cd⑥ab⑧a |
| The medical consortium-family contract service model | Family members, general practitioners, community nurses, and preventive health care physicians of the general practice service team. | ②abcd⑤cd⑧a |
| Screening-referral-follow-up model | Medical staff in community health service centers and grade A tertiary hospital | ②e④abc⑦b |

**Intervention strategies:** ①Self-management;②Health education: a. disease knowledge b. diet c. exercise d. treatment and drugs f. regular eye examination g. daily life;③Rehabilitation training: a. configuration and guidance training of visual aids b. mobile training c. reading training d. daily life skills training；④Ophthalmic screening, assessment and treatment: a. screening b. assessment c. treatment;⑤Regular follow-up: a. remote follow-up b. outpatient follow-up c. WeChat family follow-up d. home visit e. telephone follow-up;⑥Environmental safety transformation: a. environmental assessment b. environmental transformation⑦Referral and transfer treatment ;⑧Psychological support：a. emotional support b. psychological counseling c. behavior activation therapy d. problem solving therapy;⑨Medical service appointment and reminder：a. medical service appointment b. follow-up reminders.

Supplementary material Pubmed search strategy

#1 (“old people[Title/Abstract]” OR “elder[Title/Abstract]” OR “older adults[Title/Abstract]” OR “aged[MeSH]” OR “geriatrics[MeSH]”)

#2 (“Glaucoma[MeSH]” OR “Macular Degeneration[MeSH])” OR “Diabetic Retinopathy[MeSH]” OR “cataract[MeSH]” OR “vision,low[MeSH]”

OR “vision disorders[MeSH]” OR “visual impairment*[Title/Abstract]” OR “low vision[Title/Abstract]” OR “vision impairment[Title/Abstract]”

OR “vision loss[Title/Abstract]”)

#3 (“management[Title/Abstract]” OR “rehabilitation[Title/Abstract]” OR “model[Title/Abstract]” OR “strategy[Title/Abstract]” OR “system[Title/Abstract]” OR “intervention*[Title/Abstract]”)

#4 #1 AND #2 AND #3
